# Supplementary material for: Influence of Cu–Zn co-doping on the degradation performance of a Ti/SnO2–Sb anode
Source: Royal Society of Chemistry journal article supplement (doi:10.1039/d2nj01311h), 2022-01-01
Supplement: d2nj01311h1.pdf [file d2nj01311h1.pdf]

Fig. S1 EDS spectrum of (a) Ti/SnO<sub>2</sub>-Sb, (b) Ti/SnO<sub>2</sub>-Sb-Zn, (c) Ti/SnO<sub>2</sub>-Sb-Cu, (d) Ti/SnO<sub>2</sub>-Sb-Cu-Zn

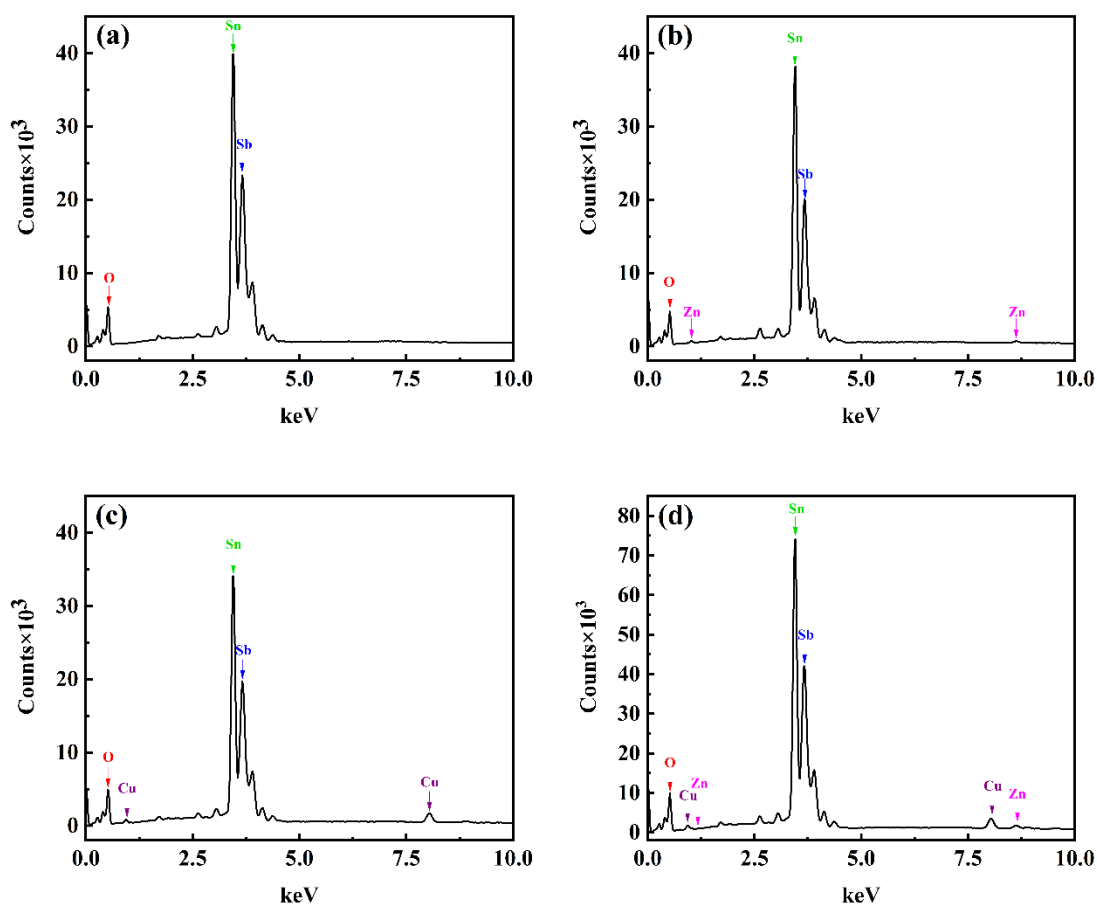

Fig. S2 Elemental distribution of Zn in Ti/SnO<sub>2</sub>-Sb-Zn

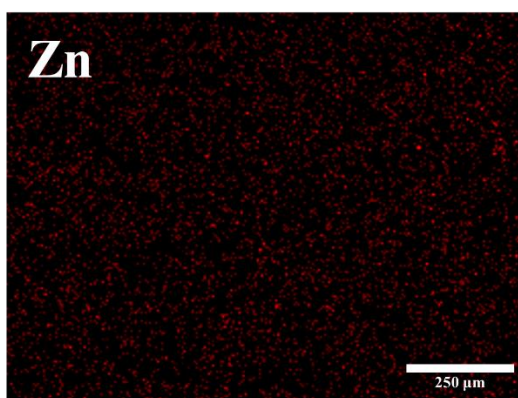

Fig. S3 Elemental distribution of Cu in Ti/SnO<sub>2</sub>-Sb-Cu

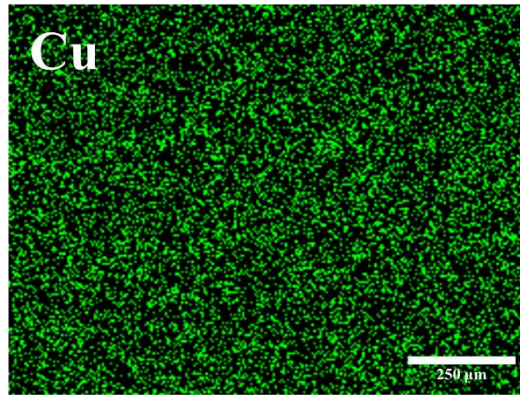

Fig. S4 Elemental distribution of Zn and Cu in Ti/SnO<sub>2</sub>-Sb-Cu-Zn

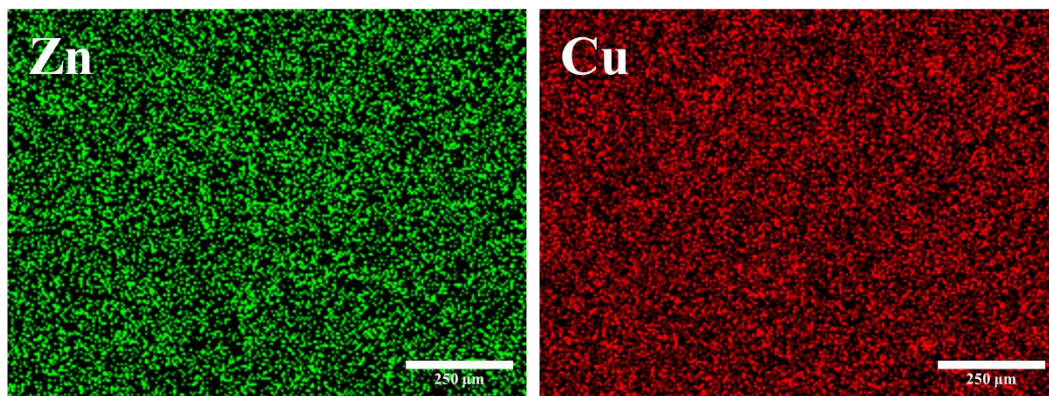

Fig. S5 Cu 2p electron orbit high-resolution spectrum and deconvolution results

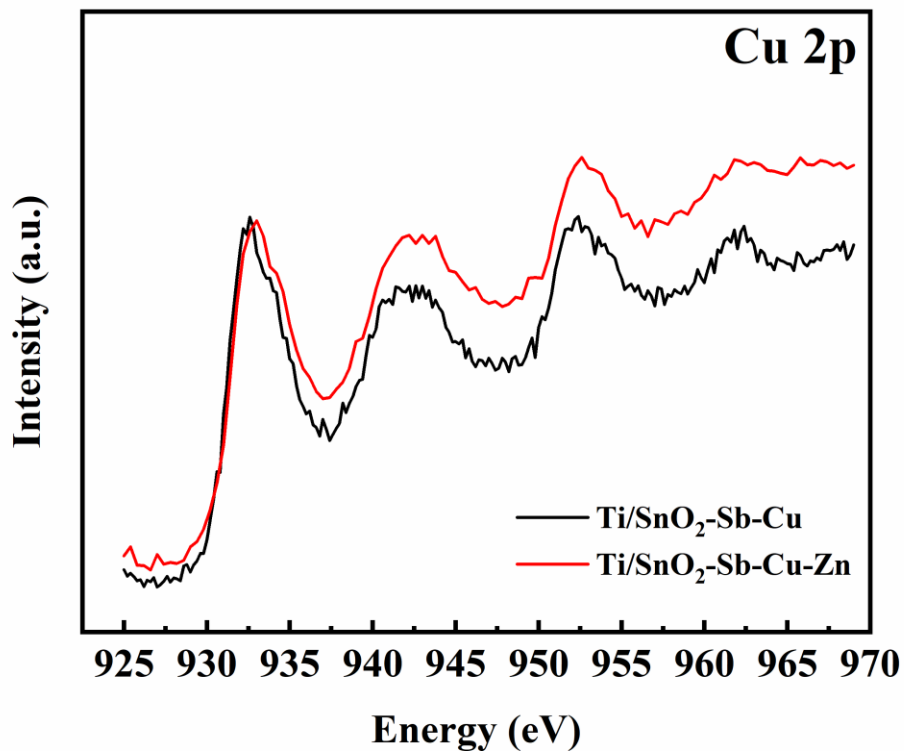

Table S1 The electrochemical parameters of the two electrodes

| Electrode                     | $q^*(\text{mC}/\text{cm}^2)$ | $R_s/(\Omega \cdot \text{cm}^2)$ | $C_{dl}/(\text{mF} \cdot \text{cm}^2)$ | $R_{ct}/(\text{k}\Omega \cdot \text{cm}^2)$ |
|-------------------------------|------------------------------|----------------------------------|----------------------------------------|---------------------------------------------|
| Ti/SnO <sub>2</sub> -Sb       | 10.88                        | 4.48                             | 0.42                                   | 19.78                                       |
| Ti/SnO <sub>2</sub> -Sb-Cu-Zn | 36.00                        | 4.55                             | 1.79                                   | 1.28                                        |
